# Supplementary material for: First-principles investigations on delithiation of Li4NiTeO6
Source: Royal Society of Chemistry journal article supplement (doi:10.1039/c4cp01627k), 2014-06-04
Supplement: c4cp01627k1.pdf [file c4cp01627k1.pdf]

## Electronic Supplementary Information (ESI)

# First-Principles Investigations on Delithiation of $\text{Li}_4\text{NiTeO}_6$

Jie Bao, Dihua Wu, Qing Tang, Zhinan Ma and Zhen Zhou\*

Received (in XXX, XXX) Xth XXXXXXXXX 20XX, Accepted Xth XXXXXXXXX 20XX

DOI: 10.1039/b000000x

<sup>a</sup> Tianjin Key Laboratory of Metal and Molecule Based Material Chemistry, Key Laboratory of Advanced Energy Materials Chemistry (Ministry of Education), Computational Centre for Molecular Science, Institute of New Energy Material Chemistry, Collaborative Innovation Center of Chemical Science and Engineering (Tianjin), Nankai University, Tianjin 300071, China. E-mail: [zhouzhen@nankai.edu.cn](mailto:zhouzhen@nankai.edu.cn)

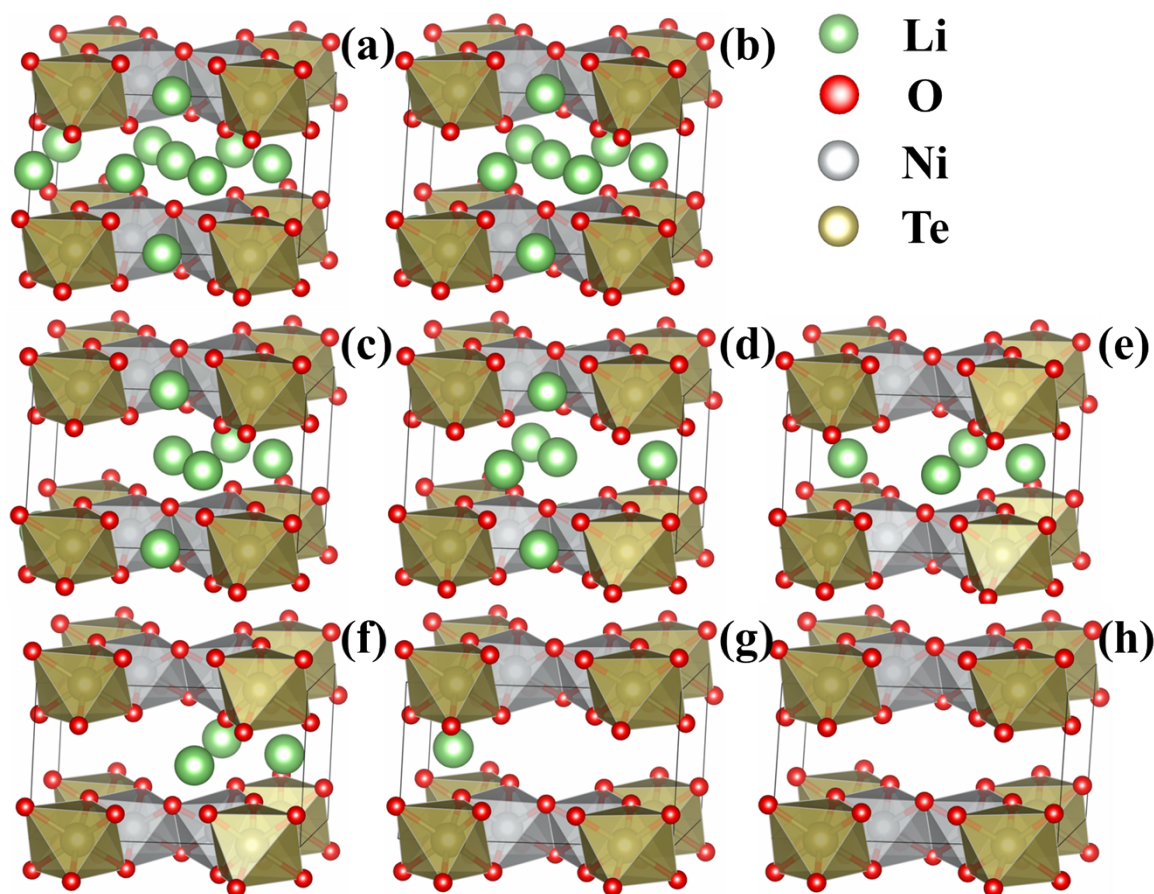

10

ESI 1 Optimized configurations of  $\text{Li}_x\text{NiTeO}_6$  ( $x=3.5, 2, 1.5, 1\ldots$ ) from (a) to (h). Balls in green, red and octahedral in grey and brown are Li, O, Ni and Te, respectively. Note that not all geometrically identical Li atoms are depicted and the No. 18 Li atom is overshadowed on condition that the lattice is displayed with the same angle in Fig. 1. Whether this Li is extracted can be checked by summing up the shown Li atoms. With regard to (d),  $\text{Li}_2\text{NiTeO}_6$ , four Li atoms are shown; therefore, the No. 18 Li atom is removed from the lattice, which is the first one extracted from the  $\text{LiNiTe}$  layer. Also, note that the Li vacancies do not rearrange until the process from  $\text{Li}_{2.5}\text{NiTeO}_6$  to  $\text{Li}_2\text{NiTeO}_6$ .

15
